# Supplementary material for: Changes in Cardiovascular Risk Factors and Cardiovascular Events in the Elderly Population
Source: PubMed Central journal article supplement — J Am Heart Assoc. 2021 May 15;10(11):e019482. doi: 10.1161/JAHA.120.019482 (PMC8483545; doi:10.1161/jaha.120.019482), 2021-05-15

# **SUPPLEMENTAL MATERIAL**

**Table S1. Definition of cardiovascular health metrics according to the American Heart Association for ascertainment of cardiovascular health status.**

| Metric                               | Optimal                                                                                                       | Intermediate                                                                                  | Poor                        |
|--------------------------------------|---------------------------------------------------------------------------------------------------------------|-----------------------------------------------------------------------------------------------|-----------------------------|
|                                      | 2 point                                                                                                       | 1 point                                                                                       | 0 point                     |
| <b>Smoking</b>                       | Never or quit $\geq 12$ months                                                                                | Quit $< 12$ months                                                                            | Current smokers             |
| <b>Body mass index</b>               | $< 25$ kg/m <sup>2</sup>                                                                                      | 25-29.9 kg/m <sup>2</sup>                                                                     | $\geq 30$ kg/m <sup>2</sup> |
| <b>Physical activity<sup>a</sup></b> | $\geq 75$ min/week of vigorous activity, $\geq 150$ min/week of moderate activity or a combination of the two | 1-74 min/week vigorous activity, 1-149 min/week moderate activity or a combination of the two | None                        |
| <b>Blood pressure<sup>b</sup></b>    | $< 120/80$ mmHg, untreated                                                                                    | $< 120/80$ mmHg on treatment or 120-139/80-89 mmHg                                            | $\geq 140/90$ mmHg          |
| <b>Fasting glucose<sup>c</sup></b>   | $< 100$ mg/dL, untreated                                                                                      | 100-126 mg/dL or $< 100$ mg/dL treated                                                        | $\geq 126$ mg/dL            |
| <b>Total cholesterol<sup>c</sup></b> | 200mg/dL, untreated                                                                                           | 200-240 mg/dL or $< 200$ mg/dL treated                                                        | $> 240$ mg/dL               |

a. Physical activity was assessed using questions on frequency and duration of participation in mildly energetic (e.g., weeding, general housework, bicycle repair), moderately energetic (e.g., dancing, cycling, leisurely swimming), and vigorous physical activity (e.g., running, hard swimming, playing squash).

b. Systolic blood pressure was measured twice with a sphygmomanometer in the sitting position after 5 min rest, and the average of the two readings was used in the present analyses.

c. Fasting blood glucose and total cholesterol were measured using standardized methods.

SI conversion factor: To convert cholesterol to millimoles per liter, multiply by 0.0259.

SI conversion factor: To convert glucose to millimoles per liter, multiply by 0.0555.

**Table S2. Definitions and ICD-10 codes used for defining the comorbidities and clinical outcomes.**

|                                              | <b>Definitions</b>                                                                                                    | <b>ICD-10 codes or conditions</b>                                                                                                                                                                                                                                                                                                                                                                                                                                                            |
|----------------------------------------------|-----------------------------------------------------------------------------------------------------------------------|----------------------------------------------------------------------------------------------------------------------------------------------------------------------------------------------------------------------------------------------------------------------------------------------------------------------------------------------------------------------------------------------------------------------------------------------------------------------------------------------|
| <b>Comorbidities</b>                         |                                                                                                                       |                                                                                                                                                                                                                                                                                                                                                                                                                                                                                              |
| Atrial fibrillation <sup>12,14,30</sup>      | Defined from diagnosis*                                                                                               | ICD-10: I48                                                                                                                                                                                                                                                                                                                                                                                                                                                                                  |
| Heart failure <sup>14,30</sup>               | Defined from diagnosis*                                                                                               | ICD-10: I11.0, I50, I97.1                                                                                                                                                                                                                                                                                                                                                                                                                                                                    |
| Hypertension <sup>14,15,30</sup>             | Defined from diagnosis*                                                                                               | ICD-10: I10, I11, I12, I13, I15 and antihypertensive medication                                                                                                                                                                                                                                                                                                                                                                                                                              |
| Diabetes mellitus <sup>14,30</sup>           | Defined from diagnosis* plus treatment                                                                                | ICD-10: E10, E11, E12, E13, E14<br>Treatment: all kinds of oral antidiabetics and insulin.                                                                                                                                                                                                                                                                                                                                                                                                   |
| Dyslipidemia <sup>14,30</sup>                | Defined from diagnosis*                                                                                               | ICD-10: E78                                                                                                                                                                                                                                                                                                                                                                                                                                                                                  |
| Ischemic stroke <sup>14,30</sup>             | Defined from diagnosis*                                                                                               | ICD-10: I63, I64                                                                                                                                                                                                                                                                                                                                                                                                                                                                             |
| Transient ischemic attack <sup>14,30</sup>   | Defined from diagnosis*                                                                                               | ICD-10: G45                                                                                                                                                                                                                                                                                                                                                                                                                                                                                  |
| Hemorrhagic stroke                           | Defined from diagnosis*                                                                                               | ICD-10: I60, I61, I62                                                                                                                                                                                                                                                                                                                                                                                                                                                                        |
| Myocardial infarction <sup>31</sup>          | Defined from diagnosis*                                                                                               | ICD-10: I21, I22, I25.2<br>Acute myocardial infarction: admission diagnosis (ICD-10: I21, I22) concurrently with coronary angiography (HA670, HA680, HA681)<br>Coronary revascularization: percutaneous coronary intervention (M6551, M6552, M6561, M6563, M6562, M6564, M6571, M6572), thrombolytic treatment (M6634), or coronary artery bypass graft (O1641, OA641, O1642, OA642, O1647, OA647)<br>Chronic ischemic heart disease: diagnosis* (ICD-10: I25.2, I25.5, I25.6, I25.8, I25.9) |
| Coronary heart disease                       | Defined from a history of acute myocardial infarction, coronary revascularization, or chronic ischemic heart disease. |                                                                                                                                                                                                                                                                                                                                                                                                                                                                                              |
| Peripheral arterial disease <sup>14,30</sup> | Defined from diagnosis*                                                                                               | ICD-10: I70.0, I70.1, I70.2, I70.8, I70.9                                                                                                                                                                                                                                                                                                                                                                                                                                                    |
| Chronic kidney disease <sup>14,30</sup>      | Defined from eGFR or diagnosis* (if laboratory value was not available, diagnosis code was used)                      | eGFR <60mL/min per 1.73 m <sup>2</sup><br>ICD-10: N18, N19                                                                                                                                                                                                                                                                                                                                                                                                                                   |
| End-stage renal disease <sup>32</sup>        | Defined from national registry for severe illness.                                                                    | Patients with end-stage renal disease undergoing chronic dialysis or received a kidney transplant.                                                                                                                                                                                                                                                                                                                                                                                           |
| Hypertrophic cardiomyopathy <sup>33</sup>    | Defined from at least one records of either inpatient or outpatient diagnoses                                         | ICD-10: I42.1, I42.2                                                                                                                                                                                                                                                                                                                                                                                                                                                                         |
| Sleep apnea                                  | Defined from diagnosis*                                                                                               | ICD-10: G47.3                                                                                                                                                                                                                                                                                                                                                                                                                                                                                |
| Proteinuria                                  | Defined from laboratory data (if laboratory value was not available, diagnosis code was used)                         | Urine dipstick proteinuria 1+ or higher (ICD-10: N06, N391, N392, R80)                                                                                                                                                                                                                                                                                                                                                                                                                       |

|                                                     |                                                                                                                                                                                  |                                                                                                                                                                                                                                                                                                                                                                                                                                                                       |
|-----------------------------------------------------|----------------------------------------------------------------------------------------------------------------------------------------------------------------------------------|-----------------------------------------------------------------------------------------------------------------------------------------------------------------------------------------------------------------------------------------------------------------------------------------------------------------------------------------------------------------------------------------------------------------------------------------------------------------------|
| Osteoporosis <sup>34</sup>                          | Defined from diagnosis*                                                                                                                                                          | ICD-10: M80, M81, M82 (except M82.0)                                                                                                                                                                                                                                                                                                                                                                                                                                  |
| Hyperthyroidism                                     | Defined from diagnosis*                                                                                                                                                          | ICD-10: E05                                                                                                                                                                                                                                                                                                                                                                                                                                                           |
| Hypothyroidism                                      | Defined from diagnosis*                                                                                                                                                          | ICD-10: E03                                                                                                                                                                                                                                                                                                                                                                                                                                                           |
| Chronic Liver disease                               | Defined from diagnosis of chronic liver disease, cirrhosis, and hepatitis                                                                                                        | ICD-10: B18, K70, K71, K72, K73, K74, K76.1                                                                                                                                                                                                                                                                                                                                                                                                                           |
| Chronic obstructive pulmonary disease <sup>35</sup> | Defined from diagnosis* plus treatment                                                                                                                                           | ICD-10: J42, J43(except J43.0), J44<br>Treatment: SABA, SAMA, LABA, LAMA, ICS, ICS+LABA, or methylxanthine (>1 months).                                                                                                                                                                                                                                                                                                                                               |
| Malignancy                                          | Defined from diagnoses of cancer (non-benign)                                                                                                                                    | ICD-10: C00-C97                                                                                                                                                                                                                                                                                                                                                                                                                                                       |
| <b>Clinical outcomes</b>                            |                                                                                                                                                                                  |                                                                                                                                                                                                                                                                                                                                                                                                                                                                       |
| Coronary heart disease                              | Defined from an event of acute myocardial infarction, coronary revascularization, or death of which the cause was recorded as a coronary artery disease or myocardial infarction | Acute myocardial infarction:<br>admission diagnosis (ICD-10: I21, I22) concurrently with coronary angiography (HA670, HA680, HA681)<br>Coronary revascularization:<br>percutaneous coronary intervention (M6551, M6552, M6561, M6563, M6562, M6564, M6571, M6572), thrombolytic treatment (M6634), or coronary artery bypass graft (O1641, OA641, O1642, OA642, O1647, OA647)<br>Coronary artery disease or myocardial infarction:<br>ICD-10: I20, I21, I22, I23, I25 |
| Ischemic stroke <sup>12, 30</sup>                   | Defined from any discharge diagnoses with concomitant imaging studies                                                                                                            | ICD-10: I63, I64                                                                                                                                                                                                                                                                                                                                                                                                                                                      |
| Systemic embolism                                   | Defined from admission diagnosis or related death                                                                                                                                | ICD-10: I74, N280 (including renal infarction)                                                                                                                                                                                                                                                                                                                                                                                                                        |

Abbreviations: eGFR, estimated glomerular filtration rate; ICD-10, International Classification of Diseases-10th Revision.

\*To ensure accuracy, comorbidities were established based on one inpatient or two outpatient records of ICD-10 codes in the database.

**Table S3. Characteristics and cardiovascular health status at baseline and follow-up.**

| <b>Characteristics</b>                             | <b>1st<br/>(n=208,673)</b> | <b>2nd<br/>(n=109,431)</b> | <b>3rd<br/>(n=119,826)</b> | <b>4th<br/>(n=92,731)</b> | <b>5th<br/>(n=34,265)</b> |
|----------------------------------------------------|----------------------------|----------------------------|----------------------------|---------------------------|---------------------------|
| Age, mean (SD), year                               | 70.6 (5.4)                 | 72.5 (4.4)                 | 73.1 (4.5)                 | 74.4 (4.2)                | 75.6 (3.9)                |
| Men                                                | 88671 (42.5)               | 44867 (41.0)               | 52484 (43.8)               | 44604 (48.1)              | 18263 (53.3)              |
| Economic status, 0-10                              | 7 (4, 9)                   | 7 (4, 9)                   | 8 (4, 9)                   | 8 (4, 9)                  | 8 (4, 9)                  |
| Low, 0-4                                           | 65564 (31.4)               | 33793 (29.9)               | 31813 (27.4)               | 23504 (26.1)              | 8679 (26.0)               |
| Middle, 5-7                                        | 48104 (23.1)               | 24715 (21.9)               | 25416 (21.9)               | 19170 (21.3)              | 6745 (20.2)               |
| High, 8-10                                         | 95005 (45.5)               | 54372 (48.2)               | 58715 (50.6)               | 47348 (52.6)              | 17911 (53.7)              |
| Living area                                        |                            |                            |                            |                           |                           |
| Small city or rural area                           | 126996 (60.9)              | 65923 (58.4)               | 71273 (61.5)               | 58135 (64.6)              | 21319 (64.0)              |
| Metropolitan city                                  | 81677 (39.1)               | 46957 (41.6)               | 44671 (38.5)               | 31887 (35.4)              | 12016 (36.0)              |
| Hypertension                                       | 90995 (43.6)               | 59834 (58.1)               | 66663 (59.8)               | 56099 (64.5)              | 22009 (68.2)              |
| Diabetes mellitus                                  | 28664 (13.7)               | 18134 (16.1)               | 20601 (17.8)               | 17694 (19.7)              | 7060 (21.2)               |
| Dyslipidemia                                       | 63800 (30.6)               | 46957 (41.6)               | 57936 (50.0)               | 51774 (57.5)              | 20538 (61.6)              |
| Osteoporosis                                       | 60875 (29.2)               | 42228 (37.4)               | 49993 (43.1)               | 43267 (48.1)              | 16697 (50.1)              |
| CVH status, No. of ideal metrics <sup>a</sup>      |                            |                            |                            |                           |                           |
| Low, 0-2                                           | 85729 (41.1)               | 44096 (40.3)               | 32602 (28.4)               | 23604 (26.3)              | 8509 (25.6)               |
| Moderate, 3-4                                      | 111048 (53.2)              | 59028 (53.9)               | 67736 (58.9)               | 54012 (60.1)              | 20090 (60.4)              |
| High, 5-6                                          | 11896 (5.7)                | 6307 (5.8)                 | 14641 (12.7)               | 12283 (13.7)              | 4685 (14.1)               |
| No. of ideal metrics,<br>Median (IQR) <sup>a</sup> | 3 (2, 4)                   | 3 (2,4)                    | 3 (2,4)                    | 3 (2,4)                   | 3 (2,4)                   |
| 12-Point CVH score,<br>Median (IQR) <sup>b</sup>   | 7 (6, 9)                   | 8 (6,9)                    | 9 (7,10)                   | 9 (8,10)                  | 9 (8,10)                  |

Abbreviations: CVH, cardiovascular health; IQR, interquartile range, SD, standard deviation.

Values are reported as No. (%) unless otherwise indicated.

a. The cardiovascular health metrics included nonsmoking, body weight, physical activity, blood pressure, fasting blood glucose, and total cholesterol.

b. The continuous 12-point CVH score (range, higher score indicating higher CVH) was calculated by assigning 0 (poor), 1 (intermediate), and 2 (ideal) points to each of the 6 metrics and summing them.

**Table S4. The time to cardiovascular disease and all-cause mortality according to measures of baseline cardiovascular health.**

|                                               | The Time (years) to Cardiovascular Disease        |                                                |         | The Time (years) to All-Cause Mortality           |                                                 |         |
|-----------------------------------------------|---------------------------------------------------|------------------------------------------------|---------|---------------------------------------------------|-------------------------------------------------|---------|
|                                               | 60~74 years<br>(No./Total No.=<br>14,260/173,109) | ≥ 75 years<br>(No./Total No.=<br>6,234/45,379) | p-value | 60~74 years<br>(No./Total No.=<br>15,641/173,109) | ≥ 75 years<br>(No./Total No.=<br>11,507/45,379) | p-value |
| <i>CVH status, No. of ideal metrics</i>       |                                                   |                                                |         |                                                   |                                                 |         |
| Low, 0-2                                      | 2.7 [1.2; 4.2]                                    | 2.6 [1.4; 4.0]                                 | 0.627   | 3.2 [1.8; 4.6]                                    | 3.2 [1.8; 4.7]                                  | 0.792   |
| Moderate, 3-4                                 | 2.9 [1.4; 4.3]                                    | 2.5 [1.2; 4.1]                                 | 0.001   | 3.3 [2.0; 4.7]                                    | 3.1 [1.7; 4.4]                                  | 0.001   |
| High, 5-6                                     | 2.6 [1.3; 4.2]                                    | 2.6 [1.5; 4.2]                                 | 0.963   | 3.4 [1.8; 4.8]                                    | 2.8 [1.6; 4.3]                                  | 0.139   |
| <i>CVH status per No. of ideal metrics</i>    |                                                   |                                                |         |                                                   |                                                 |         |
| 0                                             | 2.5 [1.1; 3.9]                                    | 2.6 [1.4; 4.4]                                 | 0.614   | 3.6 [2.1; 4.7]                                    | 3.4 [1.3; 4.9]                                  | 0.611   |
| 1                                             | 2.6 [1.2; 4.1]                                    | 2.8 [1.3; 4.0]                                 | 0.714   | 3.3 [1.8; 4.6]                                    | 3.5 [1.8; 4.7]                                  | 0.423   |
| 2                                             | 2.7 [1.3; 4.2]                                    | 2.6 [1.4; 4.0]                                 | 0.623   | 3.2 [1.8; 4.6]                                    | 3.1 [1.8; 4.6]                                  | 0.566   |
| 3                                             | 2.8 [1.4; 4.3]                                    | 2.4 [1.2; 4.1]                                 | 0.003   | 3.3 [2.0; 4.7]                                    | 3.1 [1.7; 4.4]                                  | 0.001   |
| 4                                             | 2.9 [1.4; 4.4]                                    | 2.8 [1.3; 4.0]                                 | 0.108   | 3.4 [1.9; 4.7]                                    | 3.2 [1.8; 4.4]                                  | 0.018   |
| 5 & 6                                         | 2.6 [1.3; 4.2]                                    | 2.6 [1.5; 4.2]                                 | 0.963   | 3.4 [1.8; 4.8]                                    | 2.8 [1.6; 4.3]                                  | 0.139   |
| <i>CVH status per points on the CVH score</i> |                                                   |                                                |         |                                                   |                                                 |         |
| ≤4                                            | 2.6 [1.3; 4.1]                                    | 2.7 [1.4; 4.0]                                 | 0.724   | 3.4 [1.9; 4.7]                                    | 3.6 [1.7; 4.7]                                  | 0.927   |
| 5 or 6                                        | 2.8 [1.3; 4.2]                                    | 2.6 [1.2; 3.9]                                 | 0.070   | 3.3 [1.9; 4.7]                                    | 3.2 [1.8; 4.6]                                  | 0.365   |
| 7 or 8                                        | 2.8 [1.4; 4.3]                                    | 2.6 [1.3; 4.1]                                 | 0.081   | 3.3 [1.9; 4.7]                                    | 3.1 [1.8; 4.5]                                  | 0.037   |
| 9 or 10                                       | 2.8 [1.3; 4.4]                                    | 2.5 [1.3; 4.1]                                 | 0.375   | 3.3 [1.9; 4.6]                                    | 3.0 [1.6; 4.3]                                  | 0.003   |
| ≥11                                           | 2.3 [1.0; 3.9]                                    | 2.1 [1.4; 3.3]                                 | 0.865   | 3.1 [1.6; 4.8]                                    | 2.5 [1.6; 3.9]                                  | 0.357   |

Abbreviations: CVH, cardiovascular health.

**Table S5. Time-varying Cox proportional hazard model for incident coronary heart disease and ischemic stroke / systemic embolism as separate outcomes.**

|                                                            | Adjusted Subhazard Ratio <sup>a</sup> (95% CI) |                  |                  |                             |                                       |
|------------------------------------------------------------|------------------------------------------------|------------------|------------------|-----------------------------|---------------------------------------|
|                                                            | CVH Status, No. of Ideal Metrics               |                  |                  | Per Additional Ideal Metric | Per 1-Point Increase in the CVH Score |
|                                                            | Low, 0-2                                       | Moderate, 3-4    | High, 5-6        |                             |                                       |
| <b>Coronary heart disease</b>                              |                                                |                  |                  |                             |                                       |
| Elderly (60~74 years)<br>(No./total No.= 6,764/167,317)    | 1 (Ref)                                        | 0.66 (0.56-0.76) | 0.80 (0.75-0.86) | 0.79 (0.78-0.81)            | 0.83 (0.81-0.84)                      |
| Very-elderly (≥ 75 years)<br>(No./total No.=3,168/41,356)  | 1 (Ref)                                        | 0.81 (0.56-1.18) | 0.83 (0.69-0.99) | 0.87 (0.84-0.91)            | 0.88 (0.85-0.90)                      |
| <b>Ischemic stroke / systemic embolism</b>                 |                                                |                  |                  |                             |                                       |
| Elderly (60~74 years)<br>(No./total No.=8,192/167,317)     | 1 (Ref)                                        | 0.86 (0.73-1.01) | 0.90 (0.83-0.97) | 0.84 (0.82-0.86)            | 0.85 (0.84-0.86)                      |
| Very-elderly (≥ 75 years)<br>(No./total No.= 3,330/41,356) | 1 (Ref)                                        | 0.70 (0.80-0.97) | 0.78 (0.67-0.91) | 0.88 (0.84-0.91)            | 0.87 (0.85-0.89)                      |

Abbreviations: CI, confidence interval; CVH, cardiovascular health.

a. Subhazard ratios were adjusted for sex, age, economic status, Hospital Frailty Score, living in metropolitan cities, and competing risk of death.

**Table S6. Time-varying Cox proportional hazard model for cause-specific mortality.**

| Cause of death                      | Elderly (60–74 years)<br>(n=167,317) |                      | Very-elderly (≥ 75 years)<br>(n=41,356) |                      |
|-------------------------------------|--------------------------------------|----------------------|-----------------------------------------|----------------------|
|                                     | No. event                            | Adjusted HR (95% CI) | No. event                               | Adjusted HR (95% CI) |
| <b><i>Cardiovascular death</i></b>  | 2774                                 |                      | 2421                                    |                      |
| Cardiovascular health status        |                                      |                      |                                         |                      |
| Low (0-2 ideal metrics)             |                                      | 1 (Ref)              |                                         | 1 (Ref)              |
| Moderate (3-4 ideal metrics)        |                                      | 0.79 (0.73-0.86)     |                                         | 0.86 (0.79-0.93)     |
| High (5-6 ideal metrics)            |                                      | 0.56 (0.48-0.66)     |                                         | 0.63 (0.52-0.76)     |
| Per additional ideal metric         |                                      | 0.86 (0.83-0.89)     |                                         | 0.90 (0.87-0.93)     |
| Per end-point increase in CVH score |                                      | 0.84 (0.83-0.86)     |                                         | 0.89 (0.87-0.91)     |
| <b><i>Cancer</i></b>                | 6230                                 |                      | 2588                                    |                      |
| Cardiovascular health status        |                                      |                      |                                         |                      |
| Low (0-2 ideal metrics)             |                                      | 1 (Ref)              |                                         | 1 (Ref)              |
| Moderate (3-4 ideal metrics)        |                                      | 0.97 (0.92-1.03)     |                                         | 1.01 (0.93-1.10)     |
| High (5-6 ideal metrics)            |                                      | 0.84 (0.76-0.93)     |                                         | 1.01 (0.86-1.18)     |
| Per additional ideal metric         |                                      | 0.97 (0.95-0.99)     |                                         | 1.0 (0.97-1.04)      |
| Per end-point increase in CVH score |                                      | 0.94 (0.93-0.95)     |                                         | 0.97 (0.95-0.99)     |
| <b><i>Other causes</i></b>          | 5434                                 |                      | 4778                                    |                      |
| Cardiovascular health status        |                                      |                      |                                         |                      |
| Low (0-2 ideal metrics)             |                                      | 1 (Ref)              |                                         | 1 (Ref)              |
| Moderate (3-4 ideal metrics)        |                                      | 0.87 (0.82-0.92)     |                                         | 0.95 (0.90-1.01)     |
| High (5-6 ideal metrics)            |                                      | 0.73 (0.66-0.81)     |                                         | 0.73 (0.64-0.83)     |
| Per additional ideal metric         |                                      | 0.93 (0.91-0.95)     |                                         | 0.95 (0.93-0.98)     |
| Per end-point increase in CVH score |                                      | 0.88 (0.87-0.90)     |                                         | 0.94 (0.92-0.95)     |

Abbreviations: CI, confidence interval; CVH, cardiovascular health; HR, hazard ratio.



**Table S7. Time-varying Cox proportional hazard models for the association between individual cardiovascular health metrics and incident cardiovascular disease and all-cause mortality.**

| Level of cardiovascular health metric | Adjusted Subhazard Ratio (95% CI) <sup>a</sup>              |                                                               | Adjusted Hazard Ratio (95% CI) <sup>b</sup>                 |                                                                |
|---------------------------------------|-------------------------------------------------------------|---------------------------------------------------------------|-------------------------------------------------------------|----------------------------------------------------------------|
|                                       | Incident cardiovascular disease                             |                                                               | All-cause mortality                                         |                                                                |
|                                       | Elderly (60~74 years)<br>(No./Total No.=<br>14,260/173,109) | Very-elderly (≥ 75 years)<br>(No./Total No.=<br>6,234/45,379) | Elderly (60~74 years)<br>(No./Total No.=<br>15,641/173,109) | Very-elderly (≥ 75 years)<br>(No./Total No.=<br>11,507/45,379) |
| <b>Smoking</b>                        |                                                             |                                                               |                                                             |                                                                |
| Poor                                  | 1 (Ref)                                                     | 1 (Ref)                                                       | 1 (Ref)                                                     | 1 (Ref)                                                        |
| Intermediate                          | 0.79 (0.71-0.87)                                            | 0.79 (0.64-0.98)                                              | 0.71 (0.67-0.75)                                            | 0.71 (0.67-0.75)                                               |
| Ideal                                 | 0.76 (0.71-0.81)                                            | 0.73 (0.64-0.83)                                              | 0.69 (0.67-0.71)                                            | 0.69 (0.67-0.71)                                               |
| <b>Body mass index</b>                |                                                             |                                                               |                                                             |                                                                |
| Poor                                  | 1 (Ref)                                                     | 1 (Ref)                                                       | 1 (Ref)                                                     | 1 (Ref)                                                        |
| Intermediate                          | 0.91 (0.78-1.04)                                            | 0.80 (0.59-1.08)                                              | 0.89 (0.80-0.99)                                            | 1.0 (0.86-1.18)                                                |
| Ideal                                 | 0.81 (0.70-0.94)                                            | 0.87 (0.65-1.16)                                              | 1.08 (0.97-1.19)                                            | 1.29 (1.10-1.50)                                               |
| <b>Physical activity</b>              |                                                             |                                                               |                                                             |                                                                |
| Poor                                  | 1 (Ref)                                                     | 1 (Ref)                                                       | 1 (Ref)                                                     | 1 (Ref)                                                        |
| Intermediate                          | 0.82 (0.77-0.87)                                            | 0.82 (0.72-0.93)                                              | 0.75 (0.72-0.78)                                            | 0.92 (0.87-0.97)                                               |
| Ideal                                 | 0.73 (0.68-0.78)                                            | 0.80 (0.70-0.92)                                              | 0.75 (0.71-0.78)                                            | 0.80 (0.75-0.85)                                               |
| <b>Blood pressure</b>                 |                                                             |                                                               |                                                             |                                                                |
| Poor                                  | 1 (Ref)                                                     | 1 (Ref)                                                       | 1 (Ref)                                                     | 1 (Ref)                                                        |
| Intermediate                          | 0.82 (0.77-0.86)                                            | 0.87 (0.79-0.96)                                              | 0.93 (0.90-0.97)                                            | 0.96 (0.92-1.0)                                                |
| Ideal                                 | 0.59 (0.54-0.65)                                            | 0.65 (0.53-0.78)                                              | 0.87 (0.82-0.91)                                            | 0.98 (0.91-1.05)                                               |
| <b>Total cholesterol</b>              |                                                             |                                                               |                                                             |                                                                |
| Poor                                  | 1 (Ref)                                                     | 1 (Ref)                                                       | 1 (Ref)                                                     | 1 (Ref)                                                        |
| Intermediate                          | 0.79 (0.73-0.85)                                            | 0.90 (0.78-1.04)                                              | 0.93 (0.88-0.98)                                            | 0.97 (0.90-1.03)                                               |
| Ideal                                 | 0.72 (0.67-0.77)                                            | 0.87 (0.75-1.01)                                              | 1.06 (1.01-1.12)                                            | 1.13 (1.06-1.21)                                               |
| <b>Fasting glucose</b>                |                                                             |                                                               |                                                             |                                                                |
| Poor                                  | 1 (Ref)                                                     | 1 (Ref)                                                       | 1 (Ref)                                                     | 1 (Ref)                                                        |
| Intermediate                          | 0.71 (0.66-0.77)                                            | 0.73 (0.66-0.84)                                              | 0.69 (0.65-0.72)                                            | 0.76 (0.71-0.80)                                               |
| Ideal                                 | 0.59 (0.55-0.64)                                            | 0.67 (0.58-0.77)                                              | 0.61 (0.58-0.64)                                            | 0.69 (0.65-0.73)                                               |

Abbreviations: CI, confidence interval.

a. Each individual cardiovascular health metric was included as a time-varying variable. Subhazard ratios were adjusted for sex, age, economic status, Hospital Frailty Score, living in metropolitan cities, and competing risk of death.

b. Each individual cardiovascular health metric was included as a time-varying variable. Hazard ratios were adjusted for sex, age, economic status, Hospital Frailty Score, and living in metropolitan cities.

**Table S8. Baseline characteristics of included and excluded study participants for the analysis of change in cardiovascular health.**

| Characteristics                                 | Included<br>(N=109431) | Excluded <sup>a</sup> |                                                        |                                                           | P-value <sup>b</sup> |
|-------------------------------------------------|------------------------|-----------------------|--------------------------------------------------------|-----------------------------------------------------------|----------------------|
|                                                 |                        | All<br>(N=99242)      | Exclusion due to no<br>second examination<br>(N=97566) | Exclusion due to CVD<br>event within interval<br>(N=1676) |                      |
| <b>Baseline characteristics</b>                 |                        |                       |                                                        |                                                           |                      |
| Age, mean (SD), y                               | 70.4 (4.4)             | 70.8 (6.3)            | 70.8 (6.3)                                             | 71.3 (4.6)                                                | <0.001               |
| Men                                             | 49296 (45.0)           | 39375 (39.7)          | 38431 (39.4)                                           | 944 (56.3)                                                | <0.001               |
| Economic status, 0-10                           | 7 (4, 9)               | 7 (4, 9)              | 7 (4, 9)                                               | 7 (4, 9)                                                  | 0.015                |
| Hypertension                                    | 46978 (42.9)           | 44017 (44.4)          | 43103 (44.2)                                           | 914 (54.5)                                                | <0.001               |
| Diabetes mellitus                               | 14207 (13.0)           | 14457 (14.6)          | 14115 (14.5)                                           | 342 (20.4)                                                | <0.001               |
| Dyslipidemia                                    | 33779 (30.9)           | 30021 (30.3)          | 29363 (30.1)                                           | 658 (39.3)                                                | <0.001               |
| Chronic kidney disease                          | 1076 (1.0)             | 1144 (1.2)            | 1122 (1.1)                                             | 22 (1.3)                                                  | 0.615                |
| Anemia                                          | 16376 (15.0)           | 17420 (17.6)          | 17179 (17.6)                                           | 241 (14.4)                                                | 0.001                |
| History of bleeding                             | 2190 (2.0)             | 2177 (2.2)            | 2142 (2.2)                                             | 35 (2.1)                                                  | 0.831                |
| Hyperthyroidism                                 | 2614 (2.4)             | 2510 (2.5)            | 2470 (2.5)                                             | 40 (2.4)                                                  | 0.767                |
| Hypothyroidism                                  | 2701 (2.5)             | 2510 (2.5)            | 2469 (2.5)                                             | 41 (2.4)                                                  | 0.889                |
| COPD                                            | 7048 (6.4)             | 7176 (7.2)            | 7020 (7.2)                                             | 156 (9.3)                                                 | 0.001                |
| Liver disease                                   | 22698 (20.7)           | 19677 (19.8)          | 19271 (19.8)                                           | 406 (24.2)                                                | <0.001               |
| Hypertrophic cardiomyopathy                     | 187 (0.2)              | 174 (0.2)             | 167 (0.2)                                              | 7 (0.4)                                                   | 0.036                |
| Osteoporosis                                    | 32097 (29.3)           | 28778 (29.0)          | 28305 (29.0)                                           | 473 (28.2)                                                | 0.497                |
| <b>Baseline cardiovascular health</b>           |                        |                       |                                                        |                                                           |                      |
| CVH status, No. of ideal metrics <sup>c</sup>   |                        |                       |                                                        |                                                           | <0.001               |
| Low, 0-2                                        | 44096 (40.3)           | 41633 (42.0)          | 40828 (41.8)                                           | 805 (48.0)                                                |                      |
| Moderate, 3-4                                   | 59028 (53.9)           | 52020 (52.4)          | 51194 (52.5)                                           | 826 (49.3)                                                |                      |
| High, 5-6                                       | 6307 (5.8)             | 5589 (5.6)            | 5544 (5.7)                                             | 45 (2.7)                                                  |                      |
| No. of ideal metrics, median (IQR) <sup>c</sup> | 3 (2, 4)               | 3 (2, 4)              | 3 (2, 4)                                               | 3 (2, 3)                                                  | <0.001               |
| 12-Point CVH score, median (IQR) <sup>d</sup>   | 8 (6, 9)               | 7 (6, 9)              | 7 (6, 9)                                               | 7 (6, 8)                                                  | <0.001               |

Abbreviations: COPD, chronic obstructive pulmonary disease; CVD, cardiovascular disease; CVH, cardiovascular health; IQR, interquartile range, SD, standard deviation.

a. Excluded participants are comprised of those who died in the interval (n=248), those who had a CVD event in the interval (n=468), those who dropped out (n=924) and those with incomplete CVH metrics (n=1290).

b. P-value for contrast between included and excluded participants, derived from Pearson, chi-square and t-test where appropriate.

c. The cardiovascular health metrics included nonsmoking, body weight, physical activity, blood pressure, fasting blood glucose, and total cholesterol.

d. The continuous 12-point CVH score (range, higher score indicating higher CVH) was calculated by assigning 0 (poor), 1 (intermediate), and 2 (ideal) points to each of the 6 metrics and summing them.

**Table S9. Baseline characteristics by pattern of change in cardiovascular health.**

| <b>Pattern of change</b>       | <b>Low-Low<br/>(N=25909)</b> | <b>Low-Mod<br/>(N=17331)</b> | <b>Low-High<br/>(N=856)</b> | <b>Mod-Low<br/>(N=13560)</b> | <b>Mod-Mod<br/>(N=39760)</b> | <b>Mod-High<br/>(N=5708)</b> | <b>High-Low<br/>(N=440)</b> | <b>High-Mod<br/>(N=3872)</b> | <b>High-High<br/>(N=1995)</b> |
|--------------------------------|------------------------------|------------------------------|-----------------------------|------------------------------|------------------------------|------------------------------|-----------------------------|------------------------------|-------------------------------|
| Age, mean (SD)                 | 70.2 (4.3)                   | 70.5 (4.4)                   | 70.5 (4.4)                  | 70.3 (4.4)                   | 70.6 (4.5)                   | 70.6 (4.4)                   | 70.8 (4.7)                  | 70.4 (4.4)                   | 70.2 (4.1)                    |
| Men                            | 12096 (46.7)                 | 7940 (45.8)                  | 416 (48.6)                  | 6538 (48.2)                  | 17211 (43.3)                 | 2398 (42.0)                  | 232 (52.7)                  | 1658 (42.8)                  | 807 (40.5)                    |
| Economic Status, 0-10          | 7 (3, 9)                     | 7 (4, 9)                     | 7 (4, 9)                    | 7 (3, 9)                     | 7 (4, 9)                     | 7 (4, 9)                     | 7 (4, 9)                    | 7 (4, 9)                     | 8 (4, 9)                      |
| Hypertension                   | 15808 (61.0)                 | 8246 (47.6)                  | 159 (18.6)                  | 5943 (43.8)                  | 14934 (37.6)                 | 1040 (18.2)                  | 68 (15.5)                   | 584 (15.1)                   | 196 (9.8)                     |
| Diabetes mellitus              | 7171 (27.7)                  | 2390 (13.8)                  | 19 (2.2)                    | 1522 (11.2)                  | 2963 (7.5)                   | 67 (1.2)                     | 5 (1.1)                     | 53 (1.4)                     | 17 (0.9)                      |
| Dyslipidemia                   | 11826 (45.6)                 | 5592 (32.3)                  | 150 (17.5)                  | 4108 (30.3)                  | 10112 (25.4)                 | 974 (17.1)                   | 65 (14.8)                   | 610 (15.8)                   | 342 (17.1)                    |
| Chronic kidney disease         | 348 (1.3)                    | 154 (0.9)                    | 7 (0.8)                     | 139 (1.0)                    | 348 (0.9)                    | 47 (0.8)                     | 3 (0.7)                     | 21 (0.5)                     | 9 (0.5)                       |
| Anemia                         | 2891 (11.2)                  | 2286 (13.2)                  | 130 (15.3)                  | 1873 (13.8)                  | 6783 (17.1)                  | 1077 (18.9)                  | 84 (19.1)                   | 807 (20.8)                   | 445 (22.3)                    |
| History of bleeding            | 548 (2.1)                    | 322 (1.9)                    | 11 (1.3)                    | 257 (1.9)                    | 802 (2.0)                    | 121 (2.1)                    | 7 (1.6)                     | 84 (2.2)                     | 38 (1.9)                      |
| Hyperthyroidism                | 663 (2.6)                    | 433 (2.5)                    | 13 (1.5)                    | 326 (2.4)                    | 920 (2.3)                    | 106 (1.9)                    | 3 (0.7)                     | 91 (2.4)                     | 59 (3.0)                      |
| Hypothyroidism                 | 632 (2.4)                    | 459 (2.6)                    | 6 (0.7)                     | 322 (2.4)                    | 987 (2.5)                    | 126 (2.2)                    | 10 (2.3)                    | 100 (2.6)                    | 59 (3.0)                      |
| COPD                           | 1800 (6.9)                   | 1182 (6.8)                   | 50 (5.8)                    | 926 (6.8)                    | 2408 (6.1)                   | 331 (5.8)                    | 24 (5.5)                    | 220 (5.7)                    | 107 (5.4)                     |
| Liver disease                  | 6207 (24.0)                  | 3668 (21.2)                  | 161 (18.8)                  | 2777 (20.5)                  | 7646 (19.2)                  | 1029 (18.0)                  | 84 (19.1)                   | 742 (19.2)                   | 384 (19.2)                    |
| Hypertrophic cardiomyopathy    | 51 (0.2)                     | 40 (0.2)                     | 0 (0.0)                     | 18 (0.1)                     | 61 (0.2)                     | 14 (0.2)                     | 0 (0.0)                     | 2 (0.1)                      | 1 (0.1)                       |
| Osteoporosis                   | 7279 (28.1)                  | 5090 (29.4)                  | 251 (29.3)                  | 3758 (27.7)                  | 12018 (30.2)                 | 1749 (30.6)                  | 117 (26.6)                  | 1169 (30.2)                  | 666 (33.4)                    |
| Venous thromboembolism         | 189 (0.7)                    | 124 (0.7)                    | 5 (0.6)                     | 89 (0.7)                     | 221 (0.6)                    | 30 (0.5)                     | 3 (0.7)                     | 19 (0.5)                     | 6 (0.3)                       |
| Coagulation or platelet defect | 227 (0.9)                    | 148 (0.9)                    | 9 (1.1)                     | 105 (0.8)                    | 330 (0.8)                    | 63 (1.1)                     | 4 (0.9)                     | 36 (0.9)                     | 14 (0.7)                      |

Abbreviations: COPD, chronic obstructive pulmonary disease, SD, standard deviation.

Low stands for low cardiovascular health, mod for moderate cardiovascular health, high for high cardiovascular health.

Values are presented as median (Q1, Q3, quartiles [25th and 75th percentiles]) or number (%).

**Table S10. Change in cardiovascular health status, and association with subsequent incident cardiovascular disease and all-cause mortality after weighting to account for attrition.**

| Change in CVH Status                    | Cardiovascular Disease |                                               |                                    |                                    | All-Cause Mortality |                                               |                                    |                                   |
|-----------------------------------------|------------------------|-----------------------------------------------|------------------------------------|------------------------------------|---------------------|-----------------------------------------------|------------------------------------|-----------------------------------|
|                                         | No./Total No.          | Incidence Rate per 1000 Person-Years (95% CI) | ARD per 1000 Person-Years (95% CI) | Adjusted sHR (95% CI) <sup>a</sup> | No./Total No.       | Incidence Rate per 1000 Person-Years (95% CI) | ARD per 1000 Person-Years (95% CI) | Adjusted HR (95% CI) <sup>b</sup> |
| <b><i>Elderly (60~74 years)</i></b>     | 5942/91634             |                                               |                                    |                                    | 6020/91634          |                                               |                                    |                                   |
| Consistently low                        | 1937/22470             | 18.0<br>(17.2-18.8)                           | Ref                                | 1 (Ref)                            | 1619/22470          | 14.5<br>(13.8-15.2)                           | Ref                                | 1 (Ref)                           |
| Low to moderate                         | 1011/14715             | 14.9<br>(14.0-15.8)                           | -3.2<br>(-4.4 to -1.9)             | 0.81<br>(0.75-0.88) †              | 1019/14715          | 14.5<br>(13.7-15.5)                           | 0.1<br>(-1.1 to 1.2)               | 1.00<br>(0.92-1.08)               |
| Low to high                             | 29/716                 | 9.2<br>(6.2-13.2)                             | -8.8<br>(-13.5 to -4.1)            | 0.50<br>(0.35-0.73) †              | 38/716              | 11.9<br>(8.4-16.3)                            | -2.6<br>(-6.8 to 1.6)              | 0.84<br>(0.61-1.15)               |
| Moderate to low                         | 845/11329              | 15.3<br>(14.3-16.3)                           | -2.7<br>(-4.1 to -1.4)             | 0.83<br>(0.77-0.90) †              | 809/11329           | 14.2<br>(13.2-15.2)                           | -0.3<br>(-1.5 to 0.9)              | 0.95<br>(0.87-1.03)               |
| Consistently moderate                   | 1811/32576             | 11.8<br>(11.3-12.4)                           | -6.2<br>(-7.1 to -5.2)             | 0.65<br>(0.61-0.70) †              | 2043/32576          | 13.0<br>(12.5-13.6)                           | -1.4<br>(-2.3 to -0.5)             | 0.91<br>(0.85-0.97) †             |
| Moderate to high                        | 155/4658               | 7.6<br>(6.5-8.9)                              | -10.4<br>(-12.3 to -8.5)           | 0.43<br>(0.37-0.51) †              | 247/4658            | 12.0<br>(10.5-13.6)                           | -2.5<br>(-4.2 to -0.7)             | 0.88<br>(0.77-1.00)               |
| High to low                             | 9/336                  | 5.5<br>(2.5-10.4)                             | -12.6<br>(-19.0 to -6.1)           | 0.30<br>(0.16-0.56) †              | 15/336              | 9.0<br>(5.0-14.8)                             | -5.5<br>(-11.3 to 0.3)             | 0.57<br>(0.35-0.94)               |
| High to moderate                        | 108/3160               | 7.5<br>(6.1-9.0)                              | -10.5<br>(-12.8 to -8.3)           | 0.42<br>(0.35-0.51) †              | 178/3160            | 12.2<br>(10.4-14.1)                           | -2.3<br>(-4.4 to -0.2)             | 0.87<br>(0.75-1.01)               |
| Consistently high                       | 38/1674                | 5.6<br>(4.0-7.7)                              | -12.4<br>(-15.6 to -9.2)           | 0.32<br>(0.23-0.44) †              | 52/1674             | 5.7<br>(5.7-9.9)                              | -6.9<br>(-9.8 to -4.0)             | 0.58<br>(0.44-0.77) †             |
| <b><i>Very-elderly (≥ 75 years)</i></b> | 1846/17695             |                                               |                                    |                                    | 2953/17695          |                                               |                                    |                                   |
| Consistently low                        | 493/3898               | 30.0<br>(27.4-32.8)                           | Ref                                | 1 (Ref)                            | 679/3898            | 39.4<br>(36.5-42.5)                           | Ref                                | 1 (Ref)                           |
| Low to moderate                         | 286/2808               | 24.9<br>(22.1-28.2)                           | -4.9<br>(-8.9 to -0.9)             | 0.82<br>(0.70-0.95) †              | 467/2808            | 39.4<br>(35.9-43.1)                           | 0.0<br>(-4.7 to 4.6)               | 0.96<br>(0.85-1.09)               |
| Low to high                             | 10/142                 | 18.2<br>(8.7-33.4)                            | -11.8<br>(-26.5 to 2.8)            | 0.59<br>(0.31-1.15)                | 24/142              | 42.4<br>(27.2-63.1)                           | 3.0<br>(-13.6 to 19.6)             | 1.03<br>(0.69-1.54)               |
| Moderate to low                         | 239/2077               | 27.7<br>(24.3-31.4)                           | -2.3<br>(-6.8 to 2.1)              | 0.90<br>(0.77-1.05)                | 362/2077            | 40.2<br>(36.2-44.6)                           | 0.9<br>(-4.2 to 5.9)               | 0.95<br>(0.83-1.08)               |
| Consistently moderate                   | 704/6870               | 25.3<br>(23.5-27.3)                           | -4.7<br>(-7.8 to -1.5)             | 0.82<br>(0.73-0.92) †              | 1179/6870           | 40.9<br>(38.6-43.3)                           | 1.5<br>(-2.3 to 5.3)               | 0.97<br>(0.88-1.07)               |

|                   |        |                     |                          |                       |         |                     |                         |                     |
|-------------------|--------|---------------------|--------------------------|-----------------------|---------|---------------------|-------------------------|---------------------|
| Moderate to high  | 54/980 | 14.5<br>(10.9-18.9) | -15.5<br>(-21.4 to -9.7) | 0.48<br>(0.36-0.63) † | 127/980 | 33.3<br>(27.8-39.7) | -6.1<br>(-12.9 to 0.8)  | 0.81<br>(0.67-0.99) |
| High to low       | 3/85   | 8.6<br>(1.8-25.2)   | -21.4<br>(-40.0 to -3.1) | 0.26<br>(0.09-0.79)   | 13/85   | 37.0<br>(19.7-63.3) | -2.4<br>(-23.3 to 18.6) | 0.78<br>(0.45-1.32) |
| High to moderate  | 44/585 | 20.4<br>(14.8-27.4) | -9.6<br>(-17.2 to -2.0)  | 0.66<br>(0.49-0.90) † | 77/585  | 34.8<br>(27.5-43.5) | -4.6<br>(-13.3 to 4.1)  | 0.81<br>(0.63-1.03) |
| Consistently high | 12/250 | 13.0<br>(6.7-22.8)  | -17.1<br>(-28.5 to -5.8) | 0.42<br>(0.23-0.74) † | 24/250  | 25.8<br>(16.5-38.3) | -13.6<br>(-26.6 to 0.7) | 0.60<br>(0.39-0.91) |

Abbreviations: ARD, absolute rate difference; CI, confidence interval, CVH, cardiovascular health; HR, hazard ratio; sHR, subhazard ratio.

a. sHRs were adjusted for sex, age, economic status, Hospital Frailty Score, living in metropolitan cities, and competing risk of death.

b. HRs were adjusted for sex, age, economic status, Hospital Frailty Score, and living in metropolitan cities.

† P<0.0083 for differences reported.

**Table S11. Number of participants according to change in the level of individual cardiovascular health metrics between first and second examinations.**

| <b>Pattern of change</b>         | <b>Low-Low</b> | <b>Low-Mod</b> | <b>Low-High</b> | <b>Mod-Low</b> | <b>Mod-Mod</b> | <b>Mod-High</b> | <b>High-Low</b> | <b>High-Mod</b> | <b>High-High</b> |
|----------------------------------|----------------|----------------|-----------------|----------------|----------------|-----------------|-----------------|-----------------|------------------|
| <i>Elderly (60~74 years)</i>     |                |                |                 |                |                |                 |                 |                 |                  |
| <b>Smoking</b>                   | 10085 (10.9%)  | 1664 (1.8%)    | 3943 (4.3%)     | 940 (1%)       | 2722 (2.9%)    | 3082 (3.3%)     | 3182 (3.4%)     | 3926 (4.2%)     | 62926 (68.1%)    |
| <b>Body mass index</b>           | 3662 (4%)      | 879 (1%)       | 1117 (1.2%)     | 828 (0.9%)     | 23167 (25.1%)  | 5855 (6.3%)     | 1319 (1.4%)     | 5336 (5.8%)     | 50307 (54.4%)    |
| <b>Physical activity</b>         | 24819 (26.8%)  | 12130 (13.1%)  | 10247 (11.1%)   | 5349 (5.8%)    | 9910 (10.7%)   | 8642 (9.3%)     | 2945 (3.2%)     | 5528 (6%)       | 12900 (14%)      |
| <b>Blood pressure</b>            | 30285 (32.8%)  | 15663 (16.9%)  | 4766 (5.2%)     | 14215 (15.4%)  | 11410 (12.3%)  | 2933 (3.2%)     | 4612 (5%)       | 3062 (3.3%)     | 5524 (6%)        |
| <b>Total cholesterol</b>         | 4978 (5.4%)    | 5764 (6.2%)    | 1991 (2.2%)     | 5471 (5.9%)    | 22392 (24.2%)  | 10301 (11.1%)   | 1281 (1.4%)     | 9513 (10.3%)    | 30779 (33.3%)    |
| <b>Fasting glucose</b>           | 4495 (4.9%)    | 3703 (4%)      | 1083 (1.2%)     | 3878 (4.2%)    | 14801 (16%)    | 10990 (11.9%)   | 1117 (1.2%)     | 12597 (13.6%)   | 39806 (43%)      |
| <i>Very-elderly (≥ 75 years)</i> |                |                |                 |                |                |                 |                 |                 |                  |
| <b>Smoking</b>                   | 1340 (7.9%)    | 259 (1.5%)     | 735 (4.3%)      | 127 (0.7%)     | 424 (2.5%)     | 643 (3.8%)      | 511 (3%)        | 788 (4.6%)      | 12134 (71.5%)    |
| <b>Body mass index</b>           | 1009 (5.9%)    | 140 (0.8%)     | 481 (2.8%)      | 123 (0.7%)     | 2863 (16.9%)   | 1029 (6.1%)     | 619 (3.6%)      | 852 (5%)        | 9845 (58%)       |
| <b>Physical activity</b>         | 4820 (28.4%)   | 2664 (15.7%)   | 2074 (12.2%)    | 734 (4.3%)     | 1652 (9.7%)    | 1414 (8.3%)     | 478 (2.8%)      | 1092 (6.4%)     | 2033 (12%)       |
| <b>Blood pressure</b>            | 6055 (35.7%)   | 2996 (17.7%)   | 768 (4.5%)      | 2752 (16.2%)   | 2023 (11.9%)   | 445 (2.6%)      | 743 (4.4%)      | 447 (2.6%)      | 732 (4.3%)       |
| <b>Total cholesterol</b>         | 877 (5.2%)     | 973 (5.7%)     | 383 (2.3%)      | 975 (5.7%)     | 3861 (22.8%)   | 1827 (10.8%)    | 218 (1.3%)      | 1681 (9.9%)     | 6166 (36.4%)     |
| <b>Fasting glucose</b>           | 746 (4.4%)     | 722 (4.3%)     | 320 (1.9%)      | 705 (4.2%)     | 2776 (16.4%)   | 2136 (12.6%)    | 296 (1.7%)      | 2430 (14.3%)    | 6830 (40.3%)     |

Low stands for low cardiovascular health, mod for moderate cardiovascular health, high for high cardiovascular health.  
 Values are reported as No. (%).

**Table S12. Incidence rates for cardiovascular disease and all-cause mortality according to change in the individual cardiovascular health metrics between first and second examinations.**

| Incidence Rate per 1000 Person-Years (95% confidence intervals) |                  |                  |                  |                   |                  |                  |                  |                  |                  |
|-----------------------------------------------------------------|------------------|------------------|------------------|-------------------|------------------|------------------|------------------|------------------|------------------|
| Pattern of change                                               | Low-Low          | Low-Mod          | Low-High         | Mod-Low           | Mod-Mod          | Mod-High         | High-Low         | High-Mod         | High-High        |
| <i>Incident cardiovascular disease</i>                          |                  |                  |                  |                   |                  |                  |                  |                  |                  |
| <i>Elderly (60–74 years)</i>                                    |                  |                  |                  |                   |                  |                  |                  |                  |                  |
| <b>Smoking</b>                                                  | 20.5 (19.2-21.9) | 17.3 (14.2-20.7) | 16.7 (15.0-18.7) | 18.2 (14.5-22.6)  | 15.8 (13.4-18.6) | 16.0 (14.0-18.2) | 16.4 (14.5-18.5) | 16.1 (14.2-18.1) | 12.0 (11.6-12.4) |
| <b>Body mass index</b>                                          | 15.4 (12.9-18.2) | 13.0 (9.8-16.8)  | 29.4 (11.8-60.6) | 13.3 (10.1-17.3)  | 14.0 (13.3-14.7) | 14.2 (12.8-15.6) | 30.3 (14.5-55.7) | 13.2 (11.9-14.7) | 13.6 (13.2-14.1) |
| <b>Physical activity</b>                                        | 15.6 (14.5-16.3) | 13.6 (12.7-14.5) | 13.7 (12.7-14.8) | 14.3 (13.0-15.7)  | 10.7 (9.8-11.7)  | 12.4 (11.2-13.6) | 13.9 (12.2-15.8) | 13.2 (11.7-14.9) | 12.0 (10.913.1)  |
| <b>Blood pressure</b>                                           | 17.4 (16.5-18.4) | 15.4 (14.5-16.3) | 12.3 (10.1-14.9) | 15.1 (14.1-16.1)  | 13.4 (12.8-14.0) | 9.4 (8.3-10.6)   | 14.0 (11.4-17.0) | 9.8 (8.7-11.0)   | 7.2 (6.2-8.4)    |
| <b>Total cholesterol</b>                                        | 18.9 (17.2-20.8) | 14.1 (12.8-15.6) | 16.5 (14.0-19.3) | 13.6 (12.2-15.1)  | 13.4 (12.7-14.1) | 13.7 (12.7-14.8) | 18.0 (14.8-21.7) | 14.2 (13.1-15.3) | 12.7 (12.2-13.3) |
| <b>Fasting glucose</b>                                          | 23.6 (21.5-25.9) | 20.2 (18.1-22.5) | 15.2 (12.1-18.9) | 20.1 (18.1-22.3)  | 15.5 (14.6-16.5) | 12.3 (11.3-13.3) | 18.5 (15.1-22.5) | 12.6 (11.8-13.6) | 11.6 (11.1-12.1) |
| <i>Very-elderly (≥ 75 years)</i>                                |                  |                  |                  |                   |                  |                  |                  |                  |                  |
| <b>Smoking</b>                                                  | 38.5 (33.1-44.6) | 36.8 (25.4-51.7) | 30.7 (24.9-37.6) | 26.5 (14.5-44.4)  | 25.3 (17.5-35.3) | 30.8 (24.2-38.6) | 25.7 (19.5-33.1) | 26.4 (20.8-33.0) | 23.6 (22.3-24.9) |
| <b>Body mass index</b>                                          | 29.2 (19.7-41.6) | 23.3 (12.8-39.1) | 42.0 (8.7-122.6) | 32.4 (18.9-51.9)  | 21.0 (18.6-23.7) | 29.2 (24.5-34.5) | 37.8 (10.3-9.7)  | 28.1 (23.0-33.9) | 26.1 (24.7-27.7) |
| <b>Physical activity</b>                                        | 29.0 (27.0-31.2) | 25.6 (22.8-28.7) | 22.5 (19.4-25.9) | 25.0 (20.3-30.5)  | 22.6 (18.6-27.1) | 20.7 (16.6-25.6) | 32.1 (25.4-40.1) | 22.2 (17.2-28.2) | 20.7 (17.1-24.8) |
| <b>Blood pressure</b>                                           | 29.3 (26.4-32.5) | 28.6 (25.8-31.6) | 20.6 (13.8-29.6) | 28.1 (25.1-31.4)  | 23.5 (21.5-25.6) | 20.5 (15.8-26.1) | 28.0 (19.5-38.9) | 17.9 (13.5-23.3) | 15.4 (10.9-21.0) |
| <b>Total cholesterol</b>                                        | 26.9 (21.9-32.6) | 27.4 (22.5-33.0) | 27.1 (19.6-26.6) | 27.7 (22.8-33.3)  | 24.9 (22.5-27.5) | 23.3 (20.0-27.0) | 29.1 (18.8-42.9) | 26.9 (23.2-31.0) | 25.3 (23.3-27.3) |
| <b>Fasting glucose</b>                                          | 39.0 (32.1-46.9) | 30.7 (24.9-37.5) | 34.2 (25.2-45.5) | 33.7 (27.4-41.1)  | 26.5 (23.6-29.7) | 23.1 (20.1-26.6) | 28.0 (19.4-39.1) | 24.4 (21.5-27.7) | 23.0 (21.3-24.9) |
| <i>All-cause mortality</i>                                      |                  |                  |                  |                   |                  |                  |                  |                  |                  |
| <i>Elderly (60–74 years)</i>                                    |                  |                  |                  |                   |                  |                  |                  |                  |                  |
| <b>Smoking</b>                                                  | 25.7 (24.3-27.3) | 21.9 (18.5-25.7) | 21.3 (19.4-23.5) | 19.2 (15.4-23.5)  | 15.0 (12.7-17.7) | 16.2 (14.2-18.4) | 19.4 (17.4-21.6) | 16.0 (14.2-18.0) | 10.5 (10.1-10.9) |
| <b>Body mass index</b>                                          | 10.7 (8.7-13.0)  | 10.4 (7.6-13.8)  | 16.2 (4.4-41.4)  | 13.0 (9.8-16.9)   | 10.3 (9.7-10.9)  | 14.2 (12.8-15.6) | 8.3 (1.8-24.3)   | 11.8 (10.5-13.1) | 15.5 (15.0-16.0) |
| <b>Physical activity</b>                                        | 15.8 (15.2-16.5) | 14.0 (13.1-15.0) | 13.3 (12.3-14.4) | 13.9 (12.6-15.3)  | 10.6 (9.7-11.6)  | 11.3 (10.2-12.5) | 13.9 (12.2-15.8) | 12.2 (10.7-13.7) | 11.5 (10.5-12.6) |
| <b>Blood pressure</b>                                           | 14.8 (13.9-15.7) | 14.5 (13.6-15.3) | 14.7 (12.3-17.5) | 14.0 (13.1-15.0)  | 13.3 (12.7-13.9) | 12.3 (11.0-13.7) | 14.2 (11.7-17.2) | 11.9 (10.7-13.3) | 12.1 (10.8-13.6) |
| <b>Total cholesterol</b>                                        | 12.2 (10.8-13.6) | 11.4 (10.2-12.8) | 13.6 (11.4-16.2) | 11.6 (10.3-12.9)  | 10.7 (10.1-11.3) | 14.0 (13.0-15.1) | 18.2 (15.1-21.8) | 13.1 (12.1-14.2) | 16.7 (16.0-17.3) |
| <b>Fasting glucose</b>                                          | 21.5 (19.5-23.6) | 18.9 (16.9-21.1) | 19.8 (16.3-23.9) | 17.5 (15.7-19.5)  | 14.7 (13.8-15.7) | 13.2 (12.3-14.2) | 19.7 (16.2-23.7) | 12.6 (11.7-13.5) | 11.7 (11.2-12.2) |
| <i>Very-elderly (≥ 75 years)</i>                                |                  |                  |                  |                   |                  |                  |                  |                  |                  |
| <b>Smoking</b>                                                  | 66.5 (59.5-74.1) | 53.1 (39.4-70.0) | 55.0 (47.3-63.6) | 74.4 (53.4-101.0) | 45.7 (35.1-58.5) | 49.2 (41.1-58.5) | 49.8 (41.3-59.6) | 48.3 (40.8-56.8) | 33.6 (32.1-35.2) |

|                          |                  |                  |                  |                  |                  |                  |                  |                  |                  |
|--------------------------|------------------|------------------|------------------|------------------|------------------|------------------|------------------|------------------|------------------|
| <b>Body mass index</b>   | 19.4 (12.0-29.6) | 24.1 (13.5-39.8) | 54.4 (14.8-13.9) | 32.4 (19.2-51.2) | 25.9 (23.3-28.8) | 44.4 (38.7-50.7) | 53.8 (19.7-11.7) | 39.0 (33.2-45.6) | 43.5 (41.7-45.5) |
| <b>Physical activity</b> | 47.1 (44.5-49.8) | 38.7 (35.2-42.4) | 32.8 (29.1-36.8) | 39.9 (34.0-46.6) | 35.5 (30.6-41.0) | 29.9 (25.0-35.6) | 45.8 (37.9-54.9) | 32.2 (26.2-39.1) | 27.6 (23.5-32.2) |
| <b>Blood pressure</b>    | 39.0 (35.7-42.6) | 42.1 (38.8-45.7) | 48.1 (37.5-60.8) | 40.2 (36.7-44.1) | 37.0 (34.5-39.6) | 39.5 (33.0-46.9) | 41.5 (31.2-54.2) | 39.1 (32.5-46.6) | 38.2 (31.0-46.5) |
| <b>Total cholesterol</b> | 34.7 (29.1-41.0) | 32.8 (27.6-38.8) | 42.0 (32.7-53.1) | 34.7 (29.3-40.7) | 29.7 (27.1-32.5) | 38.2 (34.0-42.7) | 53.4 (39.4-70.8) | 40.2 (35.7-45.1) | 47.8 (45.2-50.6) |
| <b>Fasting glucose</b>   | 57.5 (49.3-66.7) | 45.5 (38.5-53.4) | 41.4 (31.6-53.3) | 53.9 (46.0-62.8) | 39.6 (36.1-43.4) | 37.3 (33.4-41.5) | 52.4 (40.5-66.7) | 37.1 (33.5-41.0) | 36.0 (33.8-38.3) |

Low stands for low cardiovascular health, mod for moderate cardiovascular health, high for high cardiovascular health.



**Table S13. Associations between 4 groups of change in cardiovascular health as defined in the Framingham study and incident cardiovascular disease and all-cause mortality.**

| Change in CVH status <sup>a</sup>      | Elderly (60~74 years) |                                    | Very-elderly (≥ 75 years) |                                    |
|----------------------------------------|-----------------------|------------------------------------|---------------------------|------------------------------------|
|                                        | No./Total No.         | Adjusted sHR (95% CI) <sup>b</sup> | No./Total No.             | Adjusted sHR (95% CI) <sup>b</sup> |
| <b>Incident cardiovascular disease</b> |                       |                                    |                           |                                    |
| Low-low                                | 1764/39326            | 1.97 (1.84-2.10)                   | 569/7091                  | 1.69 (1.50-1.90)                   |
| Low-high                               | 524/7344              | 1.42 (1.33-1.51)                   | 176/1546                  | 1.12 (0.99-1.27)                   |
| High-low                               | 1803/25893            | 1.55 (1.40-1.71)                   | 464/4519                  | 1.36 (1.15-1.61)                   |
| High-high                              | 1889/19907            | 1 [Reference]                      | 556/3805                  | 1 [Reference]                      |
| <b>All-cause mortality</b>             |                       |                                    |                           |                                    |
| Low-low                                | 1997/39326            | 1.62 (1.52-1.73)                   | 975/7091                  | 1.46 (1.33-1.60)                   |
| Low-high                               | 563/7344              | 1.11 (1.04-1.19)                   | 320/1546                  | 0.99 (0.90-1.09)                   |
| High-low                               | 1658/25893            | 1.39 (1.27-1.53)                   | 702/4519                  | 1.39 (1.22-1.57)                   |
| High-high                              | 1881/19907            | 1 [Reference]                      | 834/3805                  | 1 [Reference]                      |

Abbreviations: CI, confidence interval; CVH, cardiovascular health; HR, hazard ratio; sHR, subhazard ratio.

a. The 4 groups of change in CVH were defined as high-high (those with CVH score ≥8 at baseline and last score of ≥8, reference category), high-low (≥8 baseline and ≤7 last), low-high (≤7 baseline and ≥8 last) and low-low (≤7 baseline and ≤7 last) as used in the Framingham Offspring Study.

b. sHRs were adjusted for sex, age, economic status, Hospital Frailty Score, living in metropolitan cities, and competing risk of death.

c. HRs were adjusted for sex, age, economic status, Hospital Frailty Score, and living in metropolitan cities.

**Figure S1.** Summary of the statistical analysis design. Gray lines represent the enrollment of patients in this study cohort. Red line represent analysis according to the changes in CVH categories between the first and the second visit. CVD, cardiovascular disease; CVH, cardiovascular health.

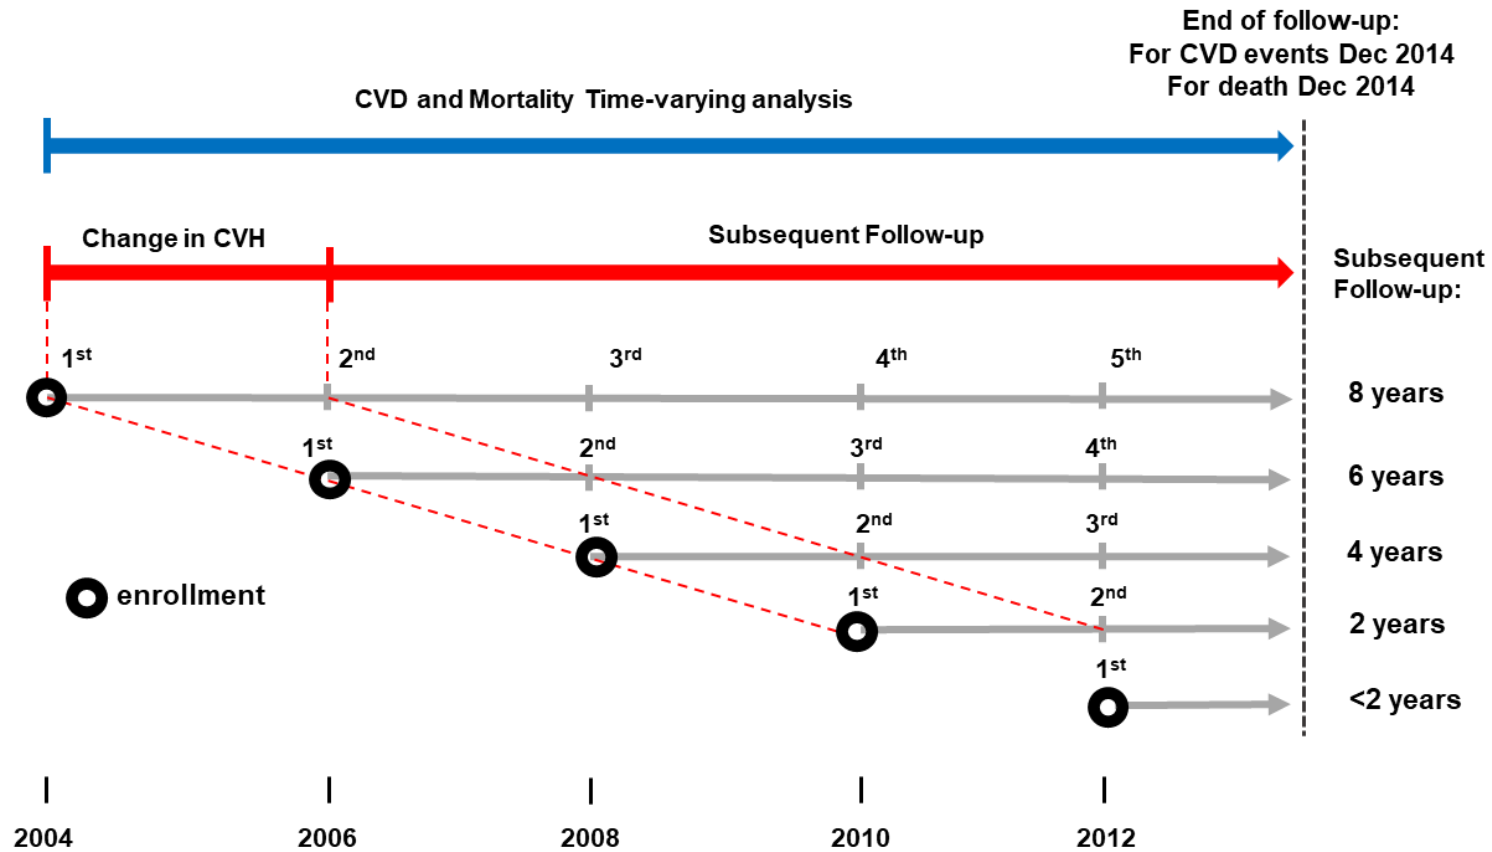

**Figure S2.** Distribution of the change in cardiovascular health between 1st and 2nd examination in the total study population (n=109,769) (A), in individuals aged <75 (n=92,490) and ≥70 years (n=16,961) (B), in women (n=60,135) and men (n=49,296) (C), and in high (n=50,330) and non-high (n=59,101) economic status (D). CVH, cardiovascular health.

**A**

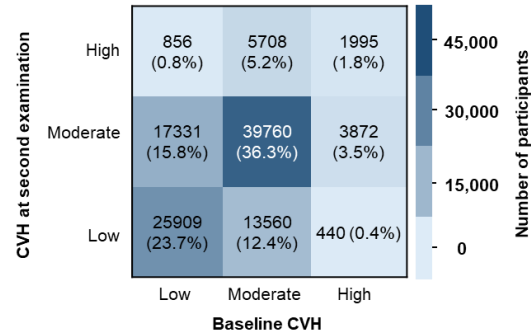

**C**

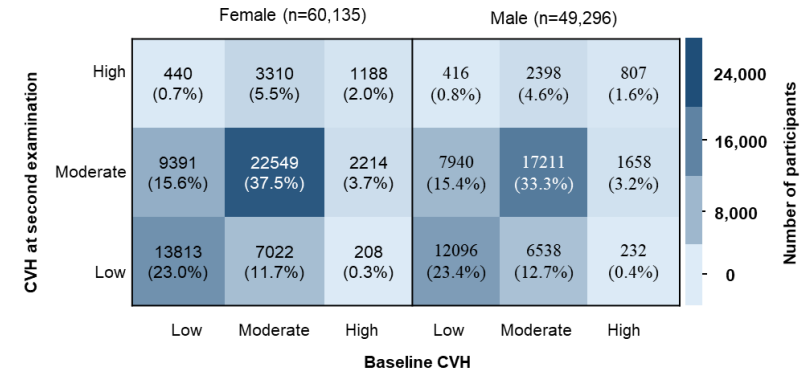

**B**

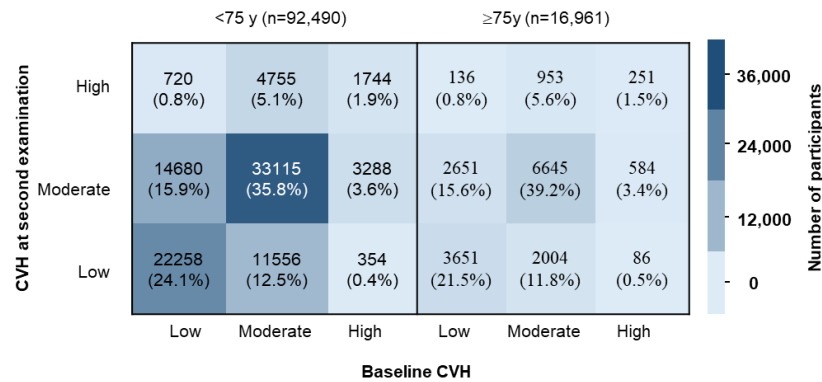

**D**

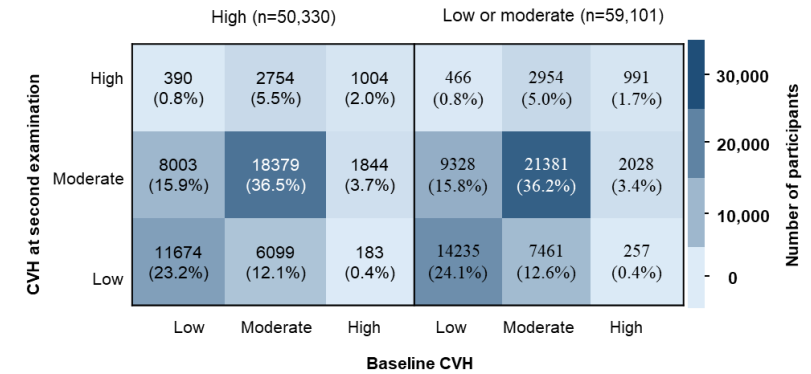

**Figure S3.** Kaplan–Meier curves of incident cardiovascular disease and all-cause mortality according to the patterns of change in cardiovascular health between the first and second health examinations.

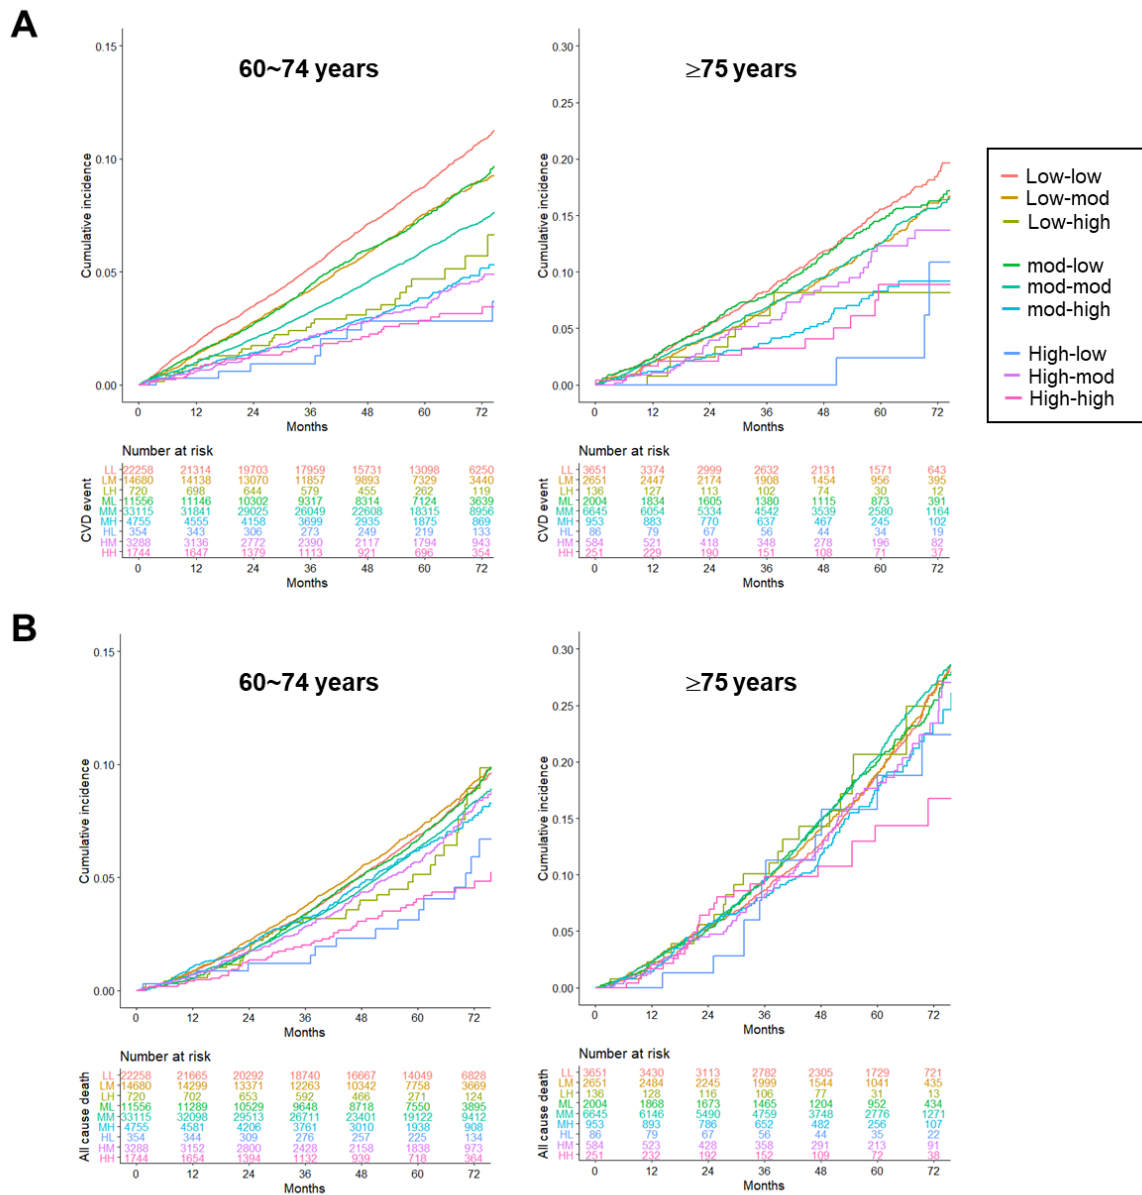

Supplement: JAH3-10-e019482-s001.pdf [file JAH3-10-e019482-s001.pdf]
